# Supplementary material for: Pathological Diagnosis of Adult Craniopharyngioma on MR Images: An Automated End-to-End Approach Based on Deep Neural Networks Requiring No Manual Segmentation
Source: MDPI journal article supplement (doi:10.3390/jcm11247481), 2022-12-16
Supplement: s1 [file s1]

Supplementary Materials S1: Radiomic features selected using LASSO regression in training set.

| Selection Method | Selected Features                                                                                                                                                                                                                                   |
|------------------|-----------------------------------------------------------------------------------------------------------------------------------------------------------------------------------------------------------------------------------------------------|
| LASSO            | LLL_glcM_Imc2,<br>shape_Maximum2DDiameterRow,<br>LLL_ngtdm_Busyness,<br>LLH_glcM_Idn,<br>HLH_glcM_Idn,<br>HLH_gldm_LargeDependenceEmphasis,<br>LLL_glszm_GrayLevelNonUniformityNormalized,<br>LLL_gldm_DependenceVariance,<br>HHH_glrIm_RunVariance |

LASSO, least absolute shrinkage and selection operator; The detailed definitions and formulas of these features are available at <https://pyradiomics.readthedocs.io/en/latest/features.html> (accessed on 19 April 2022). All radiomic features were standardized to eliminate different feature magnitudes by subtracting the mean and dividing by the standard deviation.
